# Supplementary material for: Electrocatalytic nitrogen reduction to ammonia by atomically precise Cu6 nanoclusters supported on graphene oxide
Source: Royal Society of Chemistry journal article supplement (doi:10.1039/d4nr01984a), 2024-01-01
Supplement: d4nr01984a1.pdf [file d4nr01984a1.pdf]

***Supporting Information for***

**Electrocatalytic Nitrogen Reduction to Ammonia by Atomically  
Precise Cu<sub>6</sub> Nanoclusters Supported on Graphene Oxide**

Aamir Shehzad,<sup>ab</sup> Chaonan Cui,<sup>\*a</sup> Ran Cheng,<sup>ab</sup> Zhixun Luo<sup>\*ab</sup>

<sup>a</sup> State Key Laboratory for Structural Chemistry of Unstable and Stable Species,  
Institute of Chemistry, Chinese Academy of Sciences, Beijing 100190, China

<sup>b</sup> School of Chemistry, University of Chinese Academy of Sciences, Beijing 100049,  
China

\* Corresponding authors. Emails: chncui@iccas.ac.cn (CC); zxlue@iccas.ac.cn (ZL).

## S1. Materials and Materials

**Chemicals.** All chemicals are commercially available and used without further purification, including cupric (II) acetate [Cu(OAC)<sub>2</sub>, 99%, Alfar Aesar], triphenylphosphine gold (I) chloride (AuClPPh<sub>3</sub>, 98%, Acros Organic), 2-mercapto-5-n-propylpyrimidine (SN<sub>2</sub>C<sub>7</sub>H<sub>10</sub>, SMPP, 98%, Alfar Aesar), sodium borohydride (NaBH<sub>4</sub>, 98%, Acros Organics) and triethylamine (98%, Acros Organics). Various solvents comprising dichloromethane (DCM), methanol, n-hexane and ethanol were purchased from Beijing chemical reagent Co. Ltd.

Other chemicals including graphene oxide, KOH, NaOH, HCl, salicylic acid, sodium citrate, sodium hypochlorite (NaClO), sodium nitroferricyanide dihydrate (C<sub>5</sub>FeN<sub>6</sub>Na<sub>2</sub>O.2H<sub>2</sub>O), NH<sub>4</sub>Cl, *p*-dimethylaminobenzaldehyde (C<sub>9</sub>H<sub>11</sub>NO), hydrazine monohydrate (N<sub>2</sub>H<sub>4</sub>.H<sub>2</sub>O), Nafian D521 (5 wt%) were commercially purchased without further purification. The water used for the experiment was Milli-Q water, produced by a Millipore apparatus. The carbon paper electrode was used for preparation of working electrode.

**Characterization.** The UV-vis absorption spectra were collected using an UV-3600 Shimadzu UV-vis-NIR spectrophotometer. The single-crystal X-ray diffraction (XRD) data of the synthesized Cu<sub>6</sub> nanoclusters was measured on an Rigaku MM007HF Saturn724+ single crystal X-ray diffractometer with Mo K $\alpha$  radiation ( $\lambda=0.71073$  Å). The single crystal structure was solved by direct methods and refined with full-matrix-least-squares on  $F^2$ . High resolution of electrospray ionization time-of-flight mass spectrometry (ESI-TOF-MS) measurements was conducted by a Bruker Solarix 9.4T in the positive ionization mode. To clarify the surface atoms, present in the single crystal structure according to the crystal structure data and core-level binding energies (BEs) compared to their surface oxidation states, X-ray photoelectron spectroscopy (XPS) was collected by a Thermo Fisher Scientific EscaLab250Xi spectrometer. The high-resolution morphological features of GO-supported Cu<sub>6</sub>(SMPP)<sub>6</sub> NCs were examined on high resolution transmission electron microscope (HRTEM) JSM200FS.

**Quantification of hydrazine byproduct.** Additionally, considering hydrazine to be a likely byproduct during dinitrogen reduction to ammonia, the quantification of hydrazine was also tested using the Watt and Chrisp method.<sup>1</sup> Hydrazine reacts with p-dimethylaminobenzaldehyde (PDABA, C<sub>9</sub>H<sub>11</sub>NO) in acidic media to generate yellow products with a UV-vis absorption band at 455 nm, which is used for hydrazine determination spectrophotometrically. A mixed solution of 30 mL volume of HCl (1 M), 300 mL anhydrous ethanol and 5.99 g PDABA was used as a colour reagent in this study. The standard reference solutions based on N<sub>2</sub>H<sub>4</sub>·H<sub>2</sub>O (85 %) were prepared with the concentrations of 0, 0.1, 0.2, 0.3, 0.4, 0.5, and 0.6 μg·mL<sup>-1</sup> to plot the calibration curve. Later, 5 mL volume of colour reagent and 5 mL volume of the reference solution were added to the ENRR sample solutions. After 15 minutes, absorbance at 457 nm was recorded. From the UV-vis absorption for N<sub>2</sub>H<sub>4</sub> standard solutions, the obtained calibration curve  $y=1.290x-0.00379$  ( $R^2=0.999$ ) shows a good linear relation of absorbance values with hydrazine concentrations. The yield of hydrazine after each ENRR test was evaluated by mixing 5 mL colour reagent with 5 mL residual electrolyte, and UV-vis absorption spectra were also recorded after incubation for 15 minutes.

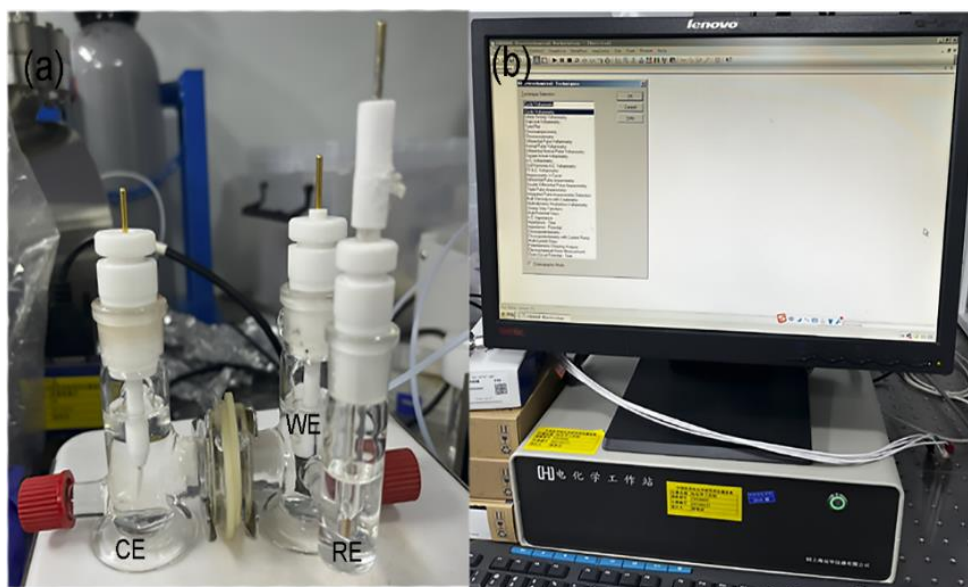

**Fig. S1** ENRR working Apparatus (a) H-cell (b) Electrochemical workstation CHI660E.

## S2. Experimental Details

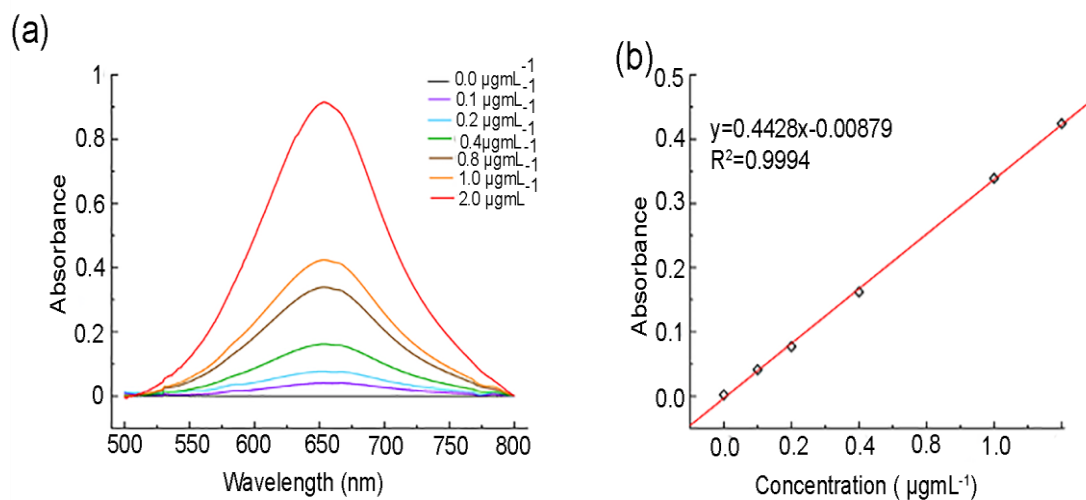

**Fig. S2** (a) UV-vis absorption spectra of indophenol assays with  $\text{NH}_4^+$  ions after incubation for 2 hours at room temperature in dark conditions. (b) Calibration curve used for determination of  $\text{NH}_3$  concentration.

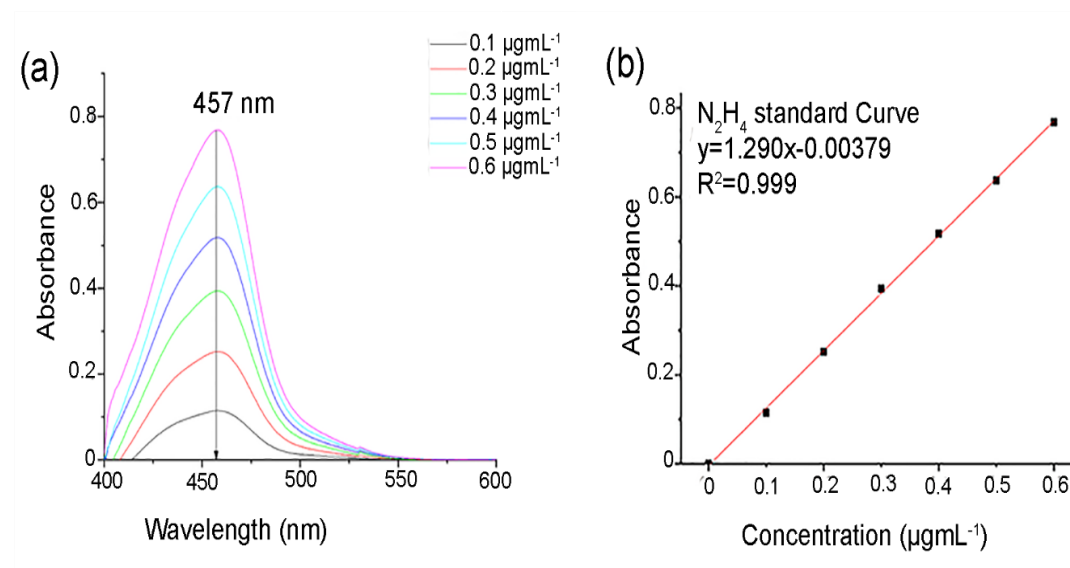

**Fig. S3** (a) UV-vis absorption spectra for  $\text{N}_2\text{H}_4$  standard solutions with different concentrations. (b) Calibration curve used for estimation of  $\text{N}_2\text{H}_4$  concentration.

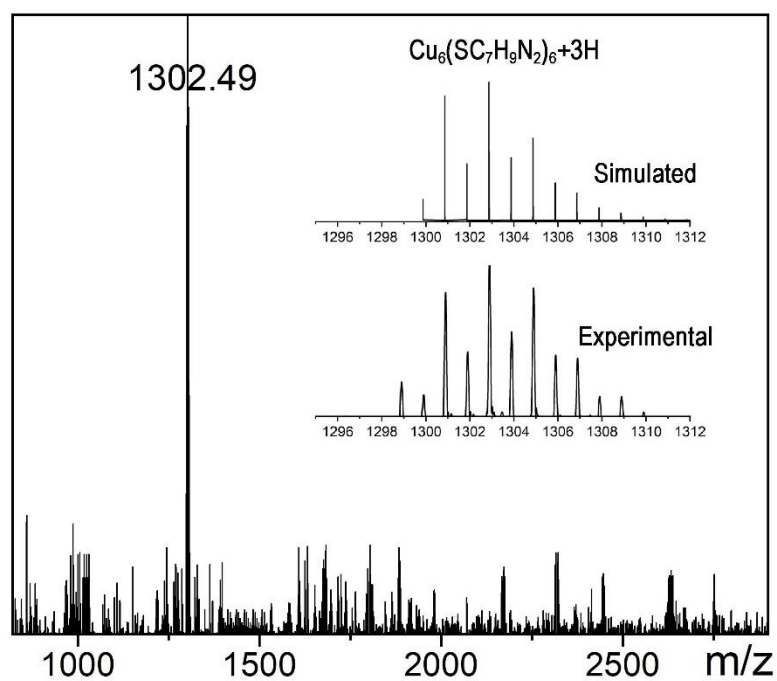

**Fig. S4** ESI-MS experimental spectrum of synthesized  $\text{Cu}_6(\text{SMPP})_6$  nanoclusters in the positive mode.

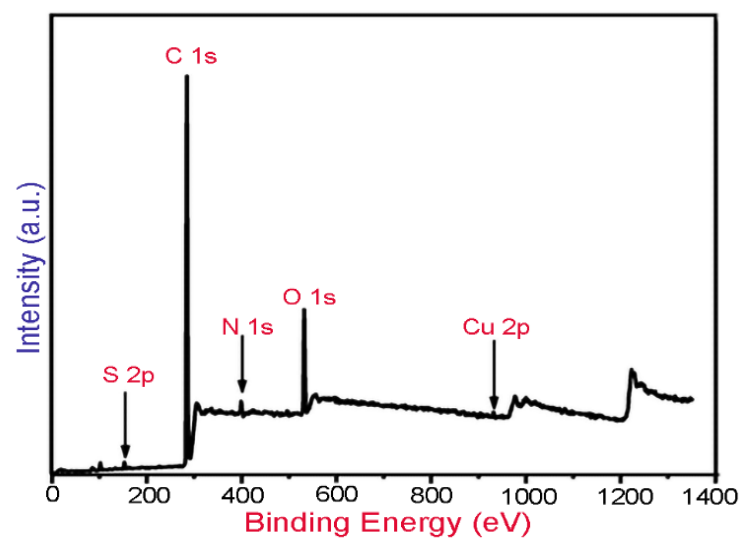

**Fig. S5** Full survey XPS spectrum of the  $\text{Cu}_6(\text{SMPP})_6$  nanoclusters.

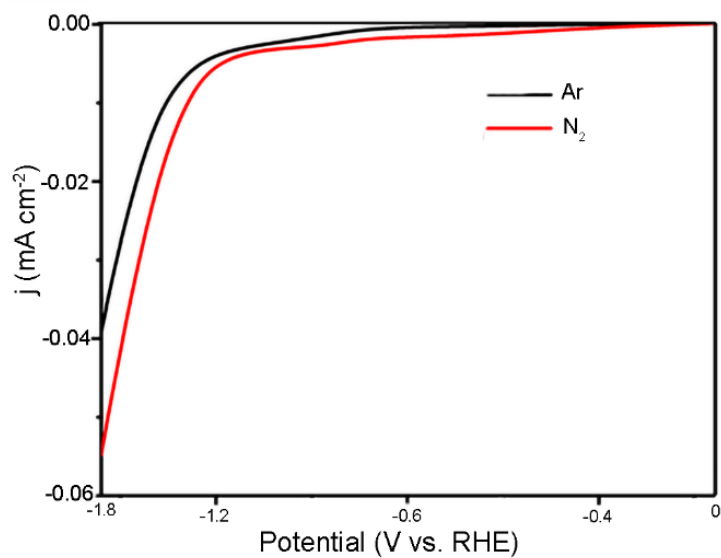

**Fig. S6** LSV curve for unsupported Cu<sub>6</sub> nanoclusters in N<sub>2</sub> and Ar-saturated 0.1 M KOH electrolyte solution.

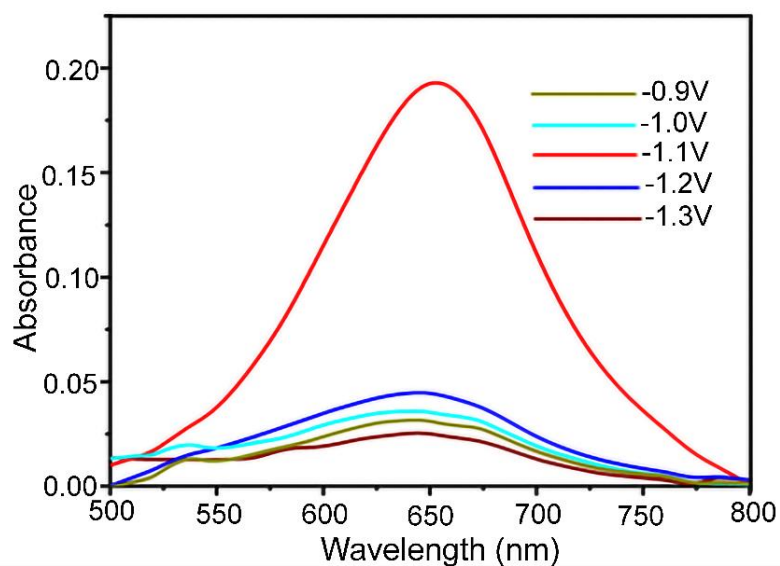

**Fig. S7** UV-visible absorption spectra using graphene-oxide-supported Cu<sub>6</sub> NCs for NRR at corresponding potentials after 2 hours incubation using indophenol assay.

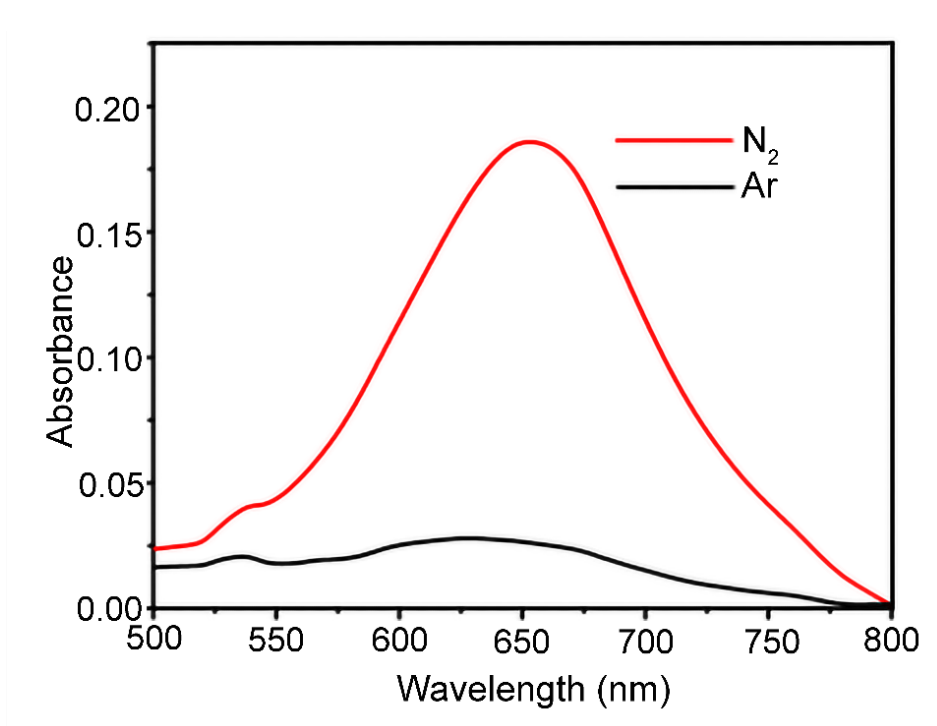

**Fig. S8** UV-visible absorption spectra after NRR using graphene oxide supported Cu<sub>6</sub> NCs in N<sub>2</sub> and Ar-saturated environment at -1.1 V to confirm source of ammonia.

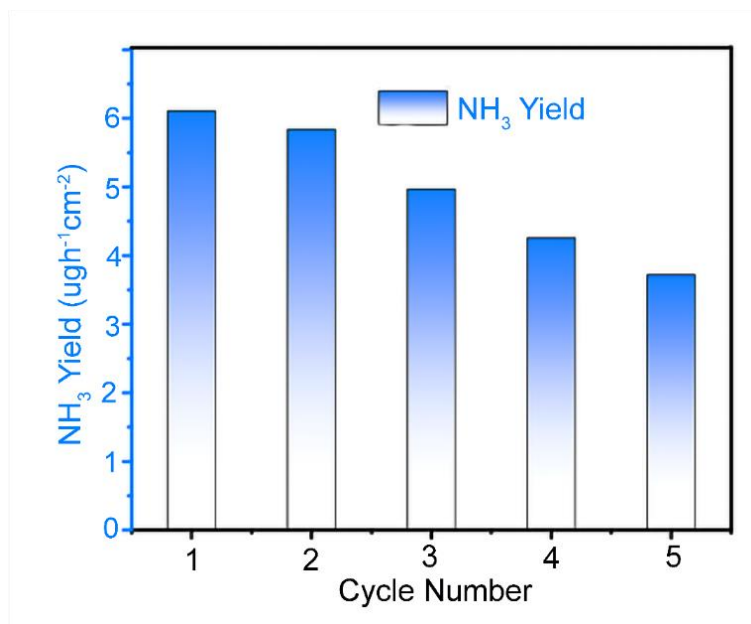

**Fig. S9** NH<sub>3</sub> yields at -1.1 V versus RHE during recycling test for five times.

### S3. Theoretical Calculation Details

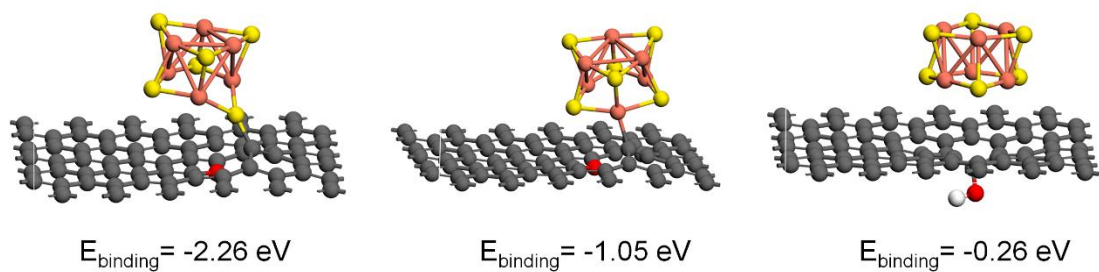

**Fig. S10** Optimized structures of  $\text{Cu}_6$  clusters supported on graphene oxide substrates.

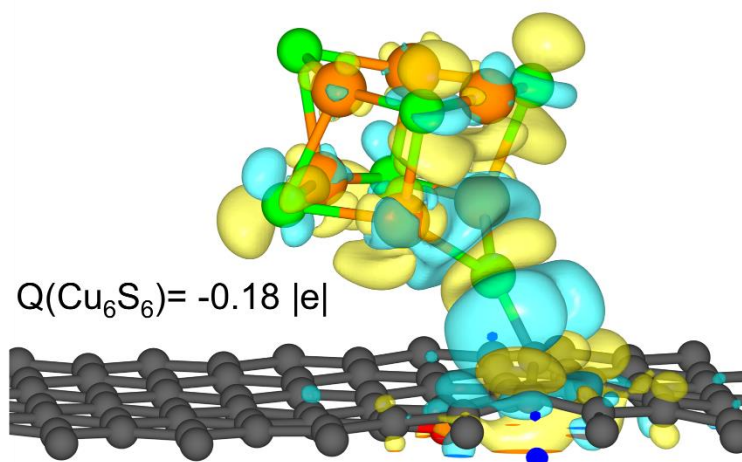

**Fig. S11** The charge density difference of the  $\text{Cu}_6\text{S}_6$  supported on GO.



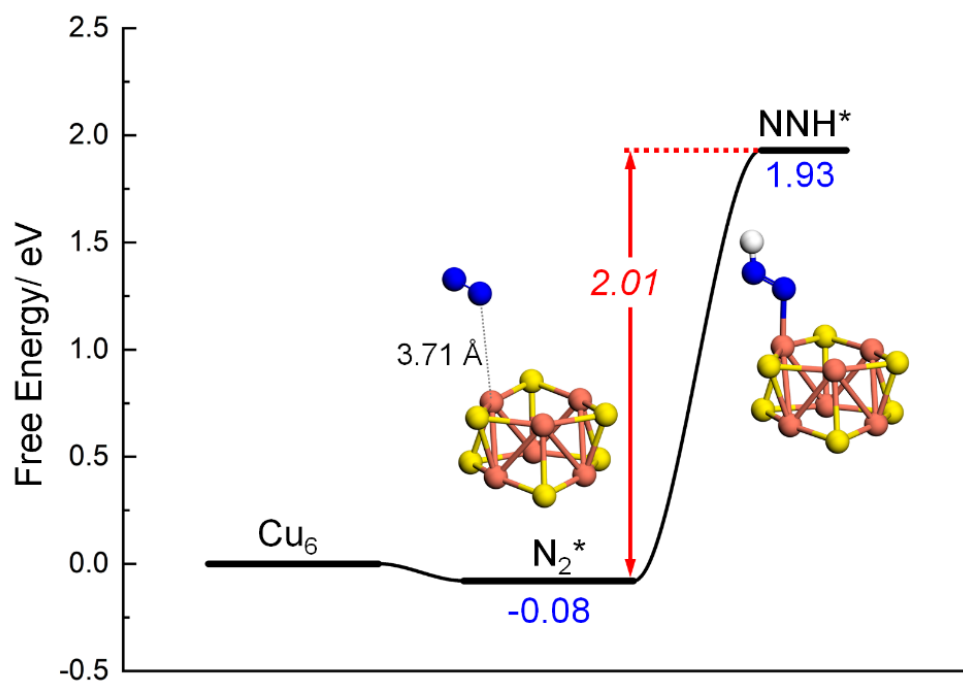

**Fig. S12** Reaction pathway for N<sub>2</sub> adsorption and hydrogenation on a Cu<sub>6</sub>S<sub>6</sub> cluster.

**Table S1** Crystallographic data for the Cu<sub>6</sub>(SMPP)<sub>6</sub> nanocluster

|                                              | In this work                                                                   | In Ref. <sup>2</sup>                                                                                 |
|----------------------------------------------|--------------------------------------------------------------------------------|------------------------------------------------------------------------------------------------------|
| Empirical formula                            | C <sub>42</sub> H <sub>54</sub> Cu <sub>6</sub> N <sub>12</sub> S <sub>6</sub> | C <sub>44</sub> H <sub>58.02</sub> Cl <sub>4.03</sub> Cu <sub>6</sub> N <sub>12</sub> S <sub>6</sub> |
| Formula weight                               | 1300.57                                                                        | 1471.33                                                                                              |
| Temperature (K)                              | 170.0(4)                                                                       | 293(2)                                                                                               |
| Crystal system                               | monoclinic                                                                     | triclinic                                                                                            |
| Space group                                  | P 2 <sub>1</sub> /n                                                            | P-1                                                                                                  |
| a (Å)                                        | 11.88670(14)                                                                   | 9.2167(4)                                                                                            |
| b (Å)                                        | 13.06844(17)                                                                   | 13.7793(6)                                                                                           |
| c (Å)                                        | 16.4807(2)                                                                     | 23.2892(7)                                                                                           |
| α (deg)                                      | 90                                                                             | 78.740(3)                                                                                            |
| β (deg)                                      | 99.397                                                                         | 88.981(3)                                                                                            |
| γ (deg)                                      | 90                                                                             | 86.659(3)                                                                                            |
| Volume (Å <sup>3</sup> )                     | 2525.76                                                                        | 2895.81(19)                                                                                          |
| Z                                            | 2                                                                              | 2                                                                                                    |
| ρ <sub>calc</sub> (g/cm <sup>3</sup> )       | 1.710                                                                          | 1.687                                                                                                |
| μ (mm <sup>-1</sup> )                        | 5.425                                                                          | 2.609                                                                                                |
| F(000)                                       | 1320                                                                           | 1489.0                                                                                               |
| Crystal size (mm <sup>3</sup> )              | 0.21 × 0.15 × 0.12                                                             | 0.22 × 0.16 × 0.15                                                                                   |
| 2θ range for data collection (deg)           | 8.546 to 154.97                                                                | 6.852 to 61.668                                                                                      |
| Index ranges                                 | -13 ≤ h ≤ 14, -12 ≤ k ≤ 16, -20 ≤ l ≤ 20                                       | -11 ≤ h ≤ 13, -19 ≤ k ≤ 19, -33 ≤ l ≤ 33                                                             |
| Reflections collected                        | 16989                                                                          | 50454                                                                                                |
| Independent reflections                      | 5169 [R <sub>int</sub> = 0.0451, R <sub>sigma</sub> = 0.0432]                  | 16012 [R <sub>int</sub> = 0.0459, R <sub>sigma</sub> = 0.0576]                                       |
| Data / restraints / parameters               | 5169/0/302                                                                     | 16012/327/733                                                                                        |
| Goodness-of-fit on F <sup>2</sup>            | 1.053                                                                          | 1.150                                                                                                |
| Final R indexes [I ≥ 2σ (I)]                 | R <sub>1</sub> = 0.0322, wR <sub>2</sub> = 0.0852                              | R <sub>1</sub> = 0.1189, wR <sub>2</sub> = 0.3059                                                    |
| Final R indexes [all data]                   | R <sub>1</sub> = 0.0364, wR <sub>2</sub> = 0.0885                              | R <sub>1</sub> = 0.1457, wR <sub>2</sub> = 0.3213                                                    |
| Largest diff. peak/hole (e Å <sup>-3</sup> ) | 0.46/-0.42                                                                     | 3.78/-1.46                                                                                           |

**Table S2** Calculated bond lengths in synthesized Cu<sub>6</sub> nanoclusters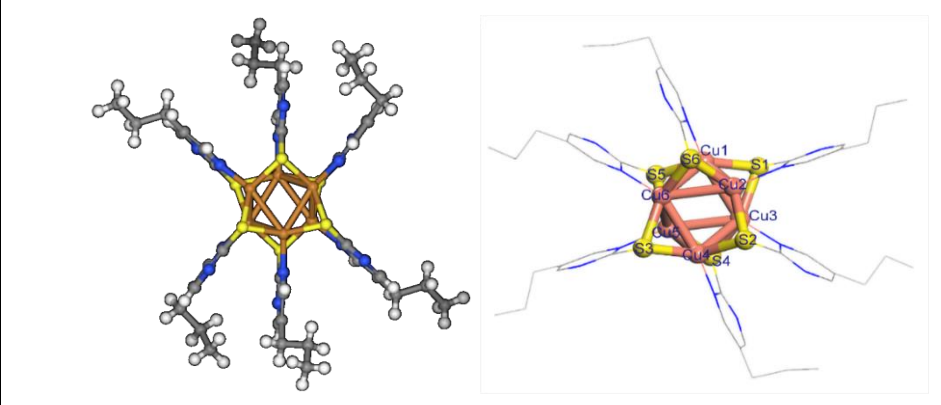

| Sr. No | Bond                             | Bond length (Å) |
|--------|----------------------------------|-----------------|
| 1      | Cu <sub>1</sub> -Cu <sub>2</sub> | 2.689           |
| 2      | Cu <sub>2</sub> -Cu <sub>3</sub> | 2.909           |
| 3      | Cu <sub>3</sub> -Cu <sub>4</sub> | 2.877           |
| 4      | Cu <sub>4</sub> -Cu <sub>5</sub> | 2.689           |
| 5      | Cu <sub>5</sub> -Cu <sub>6</sub> | 2.909           |
| 6      | Cu <sub>6</sub> -Cu <sub>1</sub> | 2.877           |
| 7      | Cu <sub>1</sub> -S <sub>1</sub>  | 2.230           |
| 8      | Cu <sub>3</sub> -S <sub>1</sub>  | 2.247           |
| 9      | Cu <sub>2</sub> -S <sub>2</sub>  | 2.270           |
| 10     | Cu <sub>4</sub> -S <sub>2</sub>  | 2.278           |
| 11     | Cu <sub>4</sub> -S <sub>3</sub>  | 2.230           |
| 12     | Cu <sub>5</sub> -S <sub>3</sub>  | 2.247           |
| 13     | Cu <sub>3</sub> -S <sub>4</sub>  | 2.263           |
| 14     | Cu <sub>6</sub> -S <sub>4</sub>  | 2.244           |
| 15     | Cu <sub>5</sub> -S <sub>5</sub>  | 2.270           |
| 16     | Cu <sub>1</sub> -S <sub>5</sub>  | 2.278           |
| 17     | Cu <sub>2</sub> -S <sub>6</sub>  | 2.244           |
| 18     | Cu <sub>5</sub> -S <sub>6</sub>  | 2.263           |
| 19     | Cu <sub>1</sub> -N <sub>1</sub>  | 2.041           |
| 20     | Cu <sub>2</sub> -N <sub>2</sub>  | 2.044           |
| 21     | Cu <sub>3</sub> -N <sub>3</sub>  | 2.049           |
| 22     | Cu <sub>4</sub> -N <sub>4</sub>  | 2.041           |
| 23     | Cu <sub>5</sub> -N <sub>5</sub>  | 2.049           |
| 24     | Cu <sub>6</sub> -N <sub>6</sub>  | 2.044           |

**Table S3** Comparison of NRR performance of Cu<sub>6</sub>/GO with other electrocatalysts

| Catalyst                                                                      | Electrolyte                                                      | NH <sub>3</sub> yield                                          | FE(%)        | Ref.      |
|-------------------------------------------------------------------------------|------------------------------------------------------------------|----------------------------------------------------------------|--------------|-----------|
| Cu <sub>6</sub> /GO NCs                                                       | 0.1 M KOH                                                        | <b>4.8 μg·h<sup>-1</sup>cm<sup>-2</sup></b>                    | <b>30.39</b> | This work |
| Cu NPs on Ti <sub>3</sub> C <sub>2</sub>                                      | 0.1 M KOH                                                        | 3.04 μmol·h <sup>-1</sup> cm <sup>-2</sup>                     | 7.31         | 3         |
| TiO <sub>2</sub> -rGO                                                         | 0.1 M Na <sub>2</sub> SO <sub>4</sub>                            | 15.13 μg·h <sup>-1</sup> mg <sup>-1</sup> <sub>cat.</sub>      | 3.3          | 4         |
| Au nanorods                                                                   | 0.1 M KOH                                                        | 1.6 μg·h <sup>-1</sup> cm <sup>-2</sup>                        | 3.88         | 5         |
| β-FeOOH nanorod                                                               | 0.5 M LiClO <sub>4</sub>                                         | 23.32 μg·h <sup>-1</sup> mg <sup>-1</sup> <sub>cat.</sub>      | 6.7          | 6         |
| γ-Fe <sub>2</sub> O <sub>3</sub>                                              | 0.1 M KOH                                                        | 0.212 μg·h <sup>-1</sup> mg <sup>-1</sup> <sub>cat.</sub>      | 1.9          | 7         |
| Pd <sub>0.2</sub> Cu <sub>0.8</sub> /rGO                                      | 0.1 M KOH                                                        | 2.8 μg·h <sup>-1</sup> mg <sup>-1</sup> <sub>cat.</sub>        | 4.5          | 8         |
| MoS <sub>2</sub> /CC                                                          | 0.1 M Na <sub>2</sub> SO <sub>4</sub>                            | 4.94 μg·h <sup>-1</sup> cm <sup>-2</sup>                       | 1.17         | 9         |
| Fe <sub>3</sub> O <sub>4</sub> /Ti                                            | 0.1 M Na <sub>2</sub> SO <sub>4</sub>                            | 3.42 μg·h <sup>-1</sup> cm <sup>-2</sup>                       | 2.6          | 10        |
| TiO <sub>2</sub> nanosheets                                                   | 0.1 M Na <sub>2</sub> SO <sub>4</sub>                            | 5.6 μg·h <sup>-1</sup> cm <sup>-2</sup>                        | 2.5          | 11        |
| B-TiO <sub>2</sub>                                                            | 0.1 M Na <sub>2</sub> SO <sub>4</sub>                            | 14.4 μg·h <sup>-1</sup> mg <sup>-1</sup> <sub>cat.</sub>       | 3.4          | 12        |
| MnB <sub>x</sub> (NO <sub>3</sub> <sup>-</sup> to NH <sub>3</sub> )           | 0.1 M Li <sub>2</sub> SO <sub>4</sub>                            | 74.9 ± 2.1 μg·h <sup>-1</sup> mg <sup>-1</sup> <sub>cat.</sub> | 38.5 ± 2.7   | 13        |
| CoO/CuO-NA/CF (NO <sub>3</sub> <sup>-</sup> to NH <sub>3</sub> )              | 0.5 M NaOH                                                       | 296.9 μmol·h <sup>-1</sup> ·cm <sup>-2</sup>                   | 92.9         | 14        |
| Au NCs on TiO <sub>2</sub> (NO <sub>3</sub> <sup>-</sup> to NH <sub>3</sub> ) | 0.2 M Na <sub>2</sub> SO <sub>4</sub> & 0.05 M NaNO <sub>3</sub> | 1923 μg·h <sup>-1</sup> ·mg <sup>-1</sup> <sub>cat.</sub>      | 91           | 15        |
| Pd/TiO <sub>2</sub> , (NO <sub>3</sub> <sup>-</sup> to NH <sub>3</sub> )      | 0.1 M K <sub>2</sub> SO <sub>4</sub>                             | 8.3 nmol·s <sup>-1</sup> cm <sup>-2</sup>                      | 25.6         | 16        |
| Ru-O-V pyramid electron bridge                                                | 0.1 M Na <sub>2</sub> SO <sub>4</sub>                            | 115 μg·h <sup>-1</sup> ·mg <sup>-1</sup> <sub>cat.</sub>       | 51.48        | 17        |
| Bi-doped FeS <sub>2</sub> (NO <sub>3</sub> <sup>-</sup> to NH <sub>3</sub> )  | 0.1 M KOH (H-cell)                                               | 21.9 μg·h <sup>-1</sup> ·cm <sup>-2</sup>                      | 98.5         | 18        |

## References

- G. W. Watt and J. D. Chrisp, *Anal. Chem.*, 1952, **24**, 2006–2008.
- H. Wu, R. Anumula, G. N. N. Andrew and Z. Luo, *Nanoscale*, 2023, **15**, 4137–4142.
- A. Liu, X. Liang, Q. Yang, X. Ren, M. Gao, Y. Yang and T. Ma, *ChemPlusChem*, 2021, **86**, 166–170.
- X. Zhang, Q. Liu, X. Shi, A. M. Asiri, Y. Luo, X. Sun and T. Li, *J. Mater. Chem. A*, 2018, **6**, 17303–17306.
- D. Bao, Q. Zhang, F.-L. Meng, H.-X. Zhong, M.-M. Shi, Y. Zhang, J.-M. Yan, Q. Jiang and X.-B. Zhang, *Adv. Mater. (Weinheim, Ger.)*, 2017, **29**, 1604799.
- X. Zhu, Z. Liu, Q. Liu, Y. Luo, X. Shi, A. M. Asiri, Y. Wu and X. Sun, *Chem. Commun.*, 2018, **54**, 11332–11335.
- J. Kong, A. Lim, C. Yoon, J. H. Jang, H. C. Ham, J. Han, S. Nam, D. Kim, Y.-E. Sung, J. Choi and H. S. Park, *ACS Sustain. Chem. Eng.*, 2017, **5**, 10986–10995.
- M.-M. Shi, D. Bao, S.-J. Li, B.-R. Wulan, J.-M. Yan and Q. Jiang, *Adv. Energy Mater.*, 2018, **8**, 1800124.
- L. Zhang, X. Ji, X. Ren, Y. Ma, X. Shi, Z. Tian, A. M. Asiri, L. Chen, B. Tang and X. Sun, *Adv Mater*, 2018, **30**, e1800191.
- Q. Liu, X. Zhang, B. Zhang, Y. Luo, G. Cui, F. Xie and X. Sun, *Nanoscale*, 2018, **10**, 14386–14389.
- R. Zhang, X. Ren, X. Shi, F. Xie, B. Zheng, X. Guo and X. Sun, *ACS Appl. Mater.*

- Interfaces*, 2018, **10**, 28251–28255.
12. Y. Wang, K. Jia, Q. Pan, Y. Xu, Q. Liu, G. Cui, X. Guo and X. Sun, *ACS Sustain. Chem. Eng.*, 2019, **7**, 117–122.
  13. M. A. Mushtaq, A. Kumar, W. Liu, Q. Ji, Y. Deng, G. Yasin, A. Saad, W. Raza, J. Zhao, S. Ajmal, Y. Wu, M. Ahmad, N. U. R. Lashari, Y. Wang, T. Li, S. Sun, D. Zheng, Y. Luo, X. Cai and X. Sun, *Adv Mater*, 2024, **36**, e2313086.
  14. S. Chen, G. Qi, R. Yin, Q. Liu, L. Feng, X. Feng, G. Hu, J. Luo, X. Liu and W. Liu, *Nanoscale*, 2023, **15**, 19577–19585.
  15. M. Yang, T. Wei, J. He, Q. Liu, L. Feng, H. Li, J. Luo and X. Liu, *Nano Res.*, 2024, **17**, 1209–1216.
  16. K. Dong, Y. Yao, H. Li, H. Li, S. Sun, X. He, Y. Wang, Y. Luo, D. Zheng, Q. Liu, Q. Li, D. Ma, X. Sun and B. Tang, *Nat. Synth.*, 2024, **3**, 763–773.
  17. Y. Sun, X. Li, Z. Wang, L. Jiang, B. Mei, W. Fan, J. Wang, J. Zhu and J. M. Lee, *J. Am. Chem. Soc.*, 2024, **146**, 7752–7762.
  18. G. Zhang, G. Wang, Y. Wan, X. Liu and K. Chu, *ACS Nano*, 2023, **17**, 21328–21336.
